# Supplementary material for: Clinicians for CARE: A Systematic Review and Meta‐Analysis of Interventions to Support Caregivers of Patients With Heart Disease
Source: PubMed Central journal article supplement — J Am Heart Assoc. 2021 Dec 7;10(24):e019706. doi: 10.1161/JAHA.120.019706 (PMC9075249; doi:10.1161/jaha.120.019706), 2021-12-07
Supplement: JAH3-10-e019706-s001.pdf [file JAH3-10-e019706-s001.pdf]

# **Supplemental Material**

**Table S1. PubMed Search terms (Limited to English).**

|    |                                                                                                                                                                                                                                                                                                                                                                                                                                                                                                                                                                                                                                                                                                                                                                                                                                                                |
|----|----------------------------------------------------------------------------------------------------------------------------------------------------------------------------------------------------------------------------------------------------------------------------------------------------------------------------------------------------------------------------------------------------------------------------------------------------------------------------------------------------------------------------------------------------------------------------------------------------------------------------------------------------------------------------------------------------------------------------------------------------------------------------------------------------------------------------------------------------------------|
| #1 | <p>(<b>"Heart Failure"</b>[Mesh:NoExp] OR <b>"Myocardial Infarction"</b>[Mesh:NoExp] OR <b>"Arrhythmias, Cardiac"</b>[Mesh:NoExp] OR <b>"Heart Diseases"</b>[Mesh:NoExp] OR <b>"Cardiovascular Diseases"</b>[Mesh:NoExp] OR <b>"coronary artery disease"</b>[tiab] OR <b>"ischemic heart disease"</b>[tiab] OR <b>"heart failure"</b>[tiab] OR <b>"myocardial infarction"</b>[tiab] OR <b>"ventricular dysfunction"</b>[tiab] OR <b>heart attack*</b>[tiab] OR <b>"acute coronary syndrome"</b>[tiab] OR <b>"coronary heart disease"</b>[tiab] OR <b>"postmyocardial infarction"</b>[tiab] OR <b>cardiomyopath*</b>[tiab] OR <b>arrhythmia*</b>[tiab] OR <b>"heart valve disease"</b>[tiab] OR <b>"pulmonary heart disease"</b>[tiab] OR <b>"hypertensive heart disease"</b>[tiab] OR <b>cardiovascular disease*</b>[tiab] OR <b>heart disease*</b>[tiab])</p> |
| #2 | <p>(<b>"Caregivers"</b>[Mesh] OR <b>"Spouses"</b>[Mesh] OR <b>caregiver*</b>[tiab] OR <b>"caring intervention"</b>[tiab] OR <b>"care giver"</b>[tiab] OR <b>"care givers"</b>[tiab] OR <b>"care giving"</b>[tiab] OR <b>spouse*</b>[tiab] OR <b>significant other*</b>[tiab] OR <b>"family caring"</b>[tiab] OR <b>family caregiver*</b>[tiab] OR <b>family partner*</b>[tiab] OR <b>"partner support"</b>[tiab] OR <b>husband*</b>[tiab] OR <b>wives</b>[tiab] OR <b>wife</b>[tiab] OR <b>partner</b>[tiab] OR <b>"adult children"</b>[tiab] OR <b>"relatives"</b>[tiab] OR <b>sibling*</b>[tiab] OR <b>spouse*</b>[tiab] OR <b>carers</b>[tiab])</p>                                                                                                                                                                                                         |
| #3 | <p>(<b>intervention*</b>[tiab] OR <b>"Counseling"</b>[Mesh] OR <b>"Social Support"</b>[Mesh] OR <b>"education"</b>[Subheading] OR <b>"Education"</b>[Mesh] OR <b>"Mentoring"</b>[Mesh] OR <b>mentor*</b>[tiab] OR <b>educat*</b>[tiab] OR <b>counsel*</b>[tiab] OR <b>coach*</b>[tiab] OR <b>train*</b>[tiab] OR <b>teach*</b>[tiab] OR <b>instruct*</b>[tiab] OR <b>support*</b> OR <b>"self care"</b>[tiab] OR <b>"self</b></p>                                                                                                                                                                                                                                                                                                                                                                                                                              |

|    |                                                                                                                                                                                                                                                                                                                                               |
|----|-----------------------------------------------------------------------------------------------------------------------------------------------------------------------------------------------------------------------------------------------------------------------------------------------------------------------------------------------|
|    | management"[tiab] OR psychoeducation[tiab] OR "Telemedicine"[Mesh] OR mHealth[tiab] OR "mobile health"[tiab] OR telemedicine[tiab] OR telemonitoring[tiab] OR "e health"[tiab] OR ((text messag*[tiab] Or mobile application*[tiab] OR mobile phone*[tiab] OR cell phone*[tiab] or smartphon*[tiab] Or smart phone*[tiab]) AND health[tiab])) |
| #4 | #1 AND #2 AND #3                                                                                                                                                                                                                                                                                                                              |
| #5 | (Animals[mesh] NOT humans[mesh])                                                                                                                                                                                                                                                                                                              |
| #6 | #4 NOT #5                                                                                                                                                                                                                                                                                                                                     |

**Table S2. Embase search terms (Limited to English, journal articles).**

|    |                                                                                                                                                                                                                                                                                                                                                                                                                                                                                                                                                                       |
|----|-----------------------------------------------------------------------------------------------------------------------------------------------------------------------------------------------------------------------------------------------------------------------------------------------------------------------------------------------------------------------------------------------------------------------------------------------------------------------------------------------------------------------------------------------------------------------|
| #1 | <p>('heart failure'/de OR 'heart infarction'/exp OR 'heart arrhythmia'/exp OR 'heart disease'/exp OR 'cardiovascular disease'/exp) OR ("coronary artery disease" OR "ischemic heart disease" OR "heart failure" OR "myocardial infarction" OR "ventricular dysfunction" OR "heart attack*" OR "acute coronary syndrome" OR "coronary heart disease" OR "postmyocardial infarction" OR cardiomyopath* OR arrhythmia* OR "heart valve disease" OR "pulmonary heart disease" OR "hypertensive heart disease" OR "cardiovascular disease*" OR "heart disease*"):ti,ab</p> |
| #2 | <p>('caregiver'/exp OR 'spouse'/exp ) OR (caregiver* OR "caring intervention" OR "care giver" OR "care givers" OR "care giving" OR spouse* OR "significant other*" OR "family caring" OR "family caregiver*" OR "family partner*" OR "partner support" OR husband* OR wives OR wife OR partner OR "adult children" OR relatives OR sibling* OR spouse* OR carers):ti,ab</p>                                                                                                                                                                                           |
| #3 | <p>('counseling'/exp OR 'social support'/exp OR 'education'/exp OR 'telemedicine'/exp) OR (mentor* OR educat* OR counsel* OR coach* OR train* Or teach* Or instruct* OR support* OR "self care" OR "self management" OR psychoeducation OR mHealth OR "mobile health" OR telemedicine OR telemonitoring OR "e health"):ti,ab OR (("text messag*":ti,ab Or "mobile application*":ti,ab OR "mobile phone*" OR "cell phone*":ti,ab or smartphon*:ti,ab Or "smart phone*":ti,ab) AND (health:ti,ab))</p>                                                                  |

|    |                                                                                                                                           |
|----|-------------------------------------------------------------------------------------------------------------------------------------------|
| #4 | #1 AND #2 AND #3                                                                                                                          |
| #5 | (Animals/exp or invertebrate/exp or 'animal experiment'/exp or 'animal tissue'/exp or 'animal cell'/exp or nonhuman/exp) NOT (humans/exp) |
| #6 | #4 NOT #5                                                                                                                                 |

**Table S3. CINAHL search terms (Limited to English, journal articles).**

|    |                                                                                                                                                                                                                                                                                                                                                                                                                                                                                                                                                                                                                                                                                                                                                                                                                                                                                                                                                                                         |
|----|-----------------------------------------------------------------------------------------------------------------------------------------------------------------------------------------------------------------------------------------------------------------------------------------------------------------------------------------------------------------------------------------------------------------------------------------------------------------------------------------------------------------------------------------------------------------------------------------------------------------------------------------------------------------------------------------------------------------------------------------------------------------------------------------------------------------------------------------------------------------------------------------------------------------------------------------------------------------------------------------|
| #1 | <p>(MH "Heart Failure") OR (MH "Myocardial Infarction") OR (MH "Heart Diseases") OR (MH "Cardiovascular Diseases") OR TI (“coronary artery disease” OR “ischemic heart disease” OR “heart failure” OR “myocardial infarction” OR “ventricular dysfunction” OR “heart attack*” OR “acute coronary syndrome” OR “coronary heart disease” OR “postmyocardial infarction” OR cardiomyopath* OR arrhythmia* OR “heart valve disease” OR “pulmonary heart disease” OR “hypertensive heart disease” OR “cardiovascular disease*” OR “heart disease*”))</p> <p>OR AB (“coronary artery disease” OR “ischemic heart disease” OR “heart failure” OR “myocardial infarction” OR “ventricular dysfunction” OR “heart attack*” OR “acute coronary syndrome” OR “coronary heart disease” OR “postmyocardial infarction” OR cardiomyopath* OR arrhythmia* OR “heart valve disease” OR “pulmonary heart disease” OR “hypertensive heart disease” OR “cardiovascular disease*” OR “heart disease*”))</p> |
| #2 | <p>(MH "Caregivers") OR (MH "Spouses") OR TI (caregiver* OR “caring intervention” OR “care giver” OR “care givers” OR “care giving” OR spouse* OR “significant other*” OR “family caring” OR “family caregiver*” OR “family partner*” OR “partner support” OR husband* OR wives OR wife OR partner OR “adult children” OR relatives OR sibling* OR spouse* OR carers) OR AB (caregiver* OR “caring intervention” OR “care giver” OR “care givers” OR “care giving” OR spouse* OR “significant other*” OR “family caring” OR “family caregiver*” OR “family partner*” OR “partner support” OR husband* OR wives</p>                                                                                                                                                                                                                                                                                                                                                                      |

|    |                                                                                                                                                                                                                                                                                                                                                                                                                                                                                                                                                                                                                                                                                                                                                                                                                                                                                          |
|----|------------------------------------------------------------------------------------------------------------------------------------------------------------------------------------------------------------------------------------------------------------------------------------------------------------------------------------------------------------------------------------------------------------------------------------------------------------------------------------------------------------------------------------------------------------------------------------------------------------------------------------------------------------------------------------------------------------------------------------------------------------------------------------------------------------------------------------------------------------------------------------------|
|    | <p>OR wife OR partner OR “adult children” OR relatives OR sibling* OR spouse* OR carers))</p>                                                                                                                                                                                                                                                                                                                                                                                                                                                                                                                                                                                                                                                                                                                                                                                            |
| #3 | <p>(MH "Counseling") OR (MH "Caregiver Support") OR (MH "Education") OR (MH "Mentorship") OR (MH "Telemedicine") OR TI (intervention* OR mentor* OR educat* OR counsel* OR coach* OR train* Or teach* Or instruct* OR support* OR “self care” OR “self management” OR psychoeducation OR mHealth OR “mobile health” OR telemedicine OR telemonitoring OR “e health” OR ((“text messag*” Or “mobile application*” OR “mobile phone*” OR “cell phone*” or smartphon* Or “smart phone*”) AND health)) OR AB (intervention* OR mentor* OR educat* OR counsel* OR coach* OR train* Or teach* Or instruct* OR support* OR “self care” OR “self management” OR psychoeducation OR mHealth OR “mobile health” OR telemedicine OR telemonitoring OR “e health” OR ((“text messag*” OR “mobile application*” OR “mobile phone*” OR “cell phone*” or smartphon* OR “smart phone*”) AND health))</p> |
| #4 | <p>#1 AND #2 AND #3</p>                                                                                                                                                                                                                                                                                                                                                                                                                                                                                                                                                                                                                                                                                                                                                                                                                                                                  |

**Table S4.** PsycINFO (Limited to English, journal articles).

|    |                                                                                                                                                                                                                                                                                                                                                                                                                                                                                                                                                                                                                                                                                                                                                                                                                                                                                                                                                        |
|----|--------------------------------------------------------------------------------------------------------------------------------------------------------------------------------------------------------------------------------------------------------------------------------------------------------------------------------------------------------------------------------------------------------------------------------------------------------------------------------------------------------------------------------------------------------------------------------------------------------------------------------------------------------------------------------------------------------------------------------------------------------------------------------------------------------------------------------------------------------------------------------------------------------------------------------------------------------|
| #1 | <p>(DE "Cardiovascular Disorders" OR DE "Heart Disorders" OR DE "Myocardial Infarctions") OR TI ("coronary artery disease" OR "ischemic heart disease" OR "heart failure" OR "myocardial infarction" OR "ventricular dysfunction" OR "heart attack*" OR "acute coronary syndrome" OR "coronary heart disease" OR "postmyocardial infarction" OR cardiomyopath* OR arrhythmia* OR "heart valve disease" OR "pulmonary heart disease" OR "hypertensive heart disease" OR "cardiovascular disease*" OR "heart disease*") OR AB ("coronary artery disease" OR "ischemic heart disease" OR "heart failure" OR "myocardial infarction" OR "ventricular dysfunction" OR "heart attack*" OR "acute coronary syndrome" OR "coronary heart disease" OR "postmyocardial infarction" OR cardiomyopath* OR arrhythmia* OR "heart valve disease" OR "pulmonary heart disease" OR "hypertensive heart disease" OR "cardiovascular disease*" OR "heart disease*"))</p> |
| #2 | <p>((DE "Caregivers") OR (DE "Spouses")) OR TI (caregiver* OR "caring intervention" OR "care giver" OR "care givers" OR "care giving" OR spouse* OR "significant other*" OR "family caring" OR "family caregiver*" OR "family partner*" OR "partner support" OR husband* OR wives OR wife OR partner OR "adult children" OR relatives OR sibling* OR spouse* OR carers) OR AB (caregiver* OR "caring intervention" OR "care giver" OR "care givers" OR "care giving" OR spouse* OR "significant other*" OR "family caring" OR "family caregiver*" OR "family partner*" OR "partner support" OR husband* OR wives</p>                                                                                                                                                                                                                                                                                                                                   |

|    |                                                                                                                                                                                                                                                                                                                                                                                                                                                                                                                                                                                                                                                                                                                                                                                                                                                                          |
|----|--------------------------------------------------------------------------------------------------------------------------------------------------------------------------------------------------------------------------------------------------------------------------------------------------------------------------------------------------------------------------------------------------------------------------------------------------------------------------------------------------------------------------------------------------------------------------------------------------------------------------------------------------------------------------------------------------------------------------------------------------------------------------------------------------------------------------------------------------------------------------|
|    | OR wife OR partner OR “adult children” OR relatives OR sibling* OR spouse* OR carers))                                                                                                                                                                                                                                                                                                                                                                                                                                                                                                                                                                                                                                                                                                                                                                                   |
| #3 | <p>((DE "Social Support") OR (DE "Education") OR (DE "Mentor") OR (DE "Telemedicine")) OR</p> <p>OR TI (intervention* OR mentor* OR educat* OR counsel* OR coach* OR train* Or teach* Or instruct* OR support* OR “self care” OR “self management” OR psychoeducation OR mHealth OR “mobile health” OR telemedicine OR telemonitoring OR “e health” OR ((“text messag*” Or “mobile application*” OR “mobile phone*” OR “cell phone*” or smartphon* Or “smart phone*”) AND health)) OR AB (intervention* OR mentor* OR educat* OR counsel* OR coach* OR train* Or teach* Or instruct* OR support* OR “self care” OR “self management” OR psychoeducation OR mHealth OR “mobile health” OR telemedicine OR telemonitoring OR “e health” OR ((“text messag*” OR “mobile application*” OR “mobile phone*” OR “cell phone*” or smartphon* OR “smart phone*”) AND health))</p> |
| #4 | #1 AND #2 AND #3                                                                                                                                                                                                                                                                                                                                                                                                                                                                                                                                                                                                                                                                                                                                                                                                                                                         |

**Table S5. Web of Science Search Terms (English).**

|    |                                                                                                                                                                                                                                                                                                                                                                                                                                 |
|----|---------------------------------------------------------------------------------------------------------------------------------------------------------------------------------------------------------------------------------------------------------------------------------------------------------------------------------------------------------------------------------------------------------------------------------|
| #1 | <p>TS=(“coronary artery disease” OR “ischemic heart disease” OR “heart failure” OR “myocardial infarction” OR “ventricular dysfunction” OR “heart attack*” OR “acute coronary syndrome” OR “coronary heart disease” OR “postmyocardial infarction” OR cardiomyopath* OR arrhythmia* OR “heart valve disease” OR “pulmonary heart disease” OR “hypertensive heart disease” OR “cardiovascular disease*” OR “heart disease*”)</p> |
| #2 | <p>TS=(caregiver* OR “caring intervention” OR “care giver” OR “care givers” OR “care giving” OR spouse* OR “significant other*” OR “family caring” OR “family caregiver*” OR “partner support” OR husband* OR wives OR wife OR partner OR “adult children” OR relatives OR sibling* OR spouse* OR carers)</p>                                                                                                                   |
| #3 | <p>TS=(mentor* OR educat* OR counsel* OR coach* OR train* Or teach* Or instruct* OR support* OR “self care” OR “self management” OR psychoeducation OR mHealth OR “mobile health” OR telemedicine OR telemonitoring OR “e health” OR (“text messag*” Or “mobile application*” OR “mobile phone*” OR “cell phone*” or smartphon* Or “smart phone*”) AND health))</p>                                                             |
| #4 | <p>#1 AND #2 AND #3</p>                                                                                                                                                                                                                                                                                                                                                                                                         |

**Table S6. Cochrane Search Terms.**

|    |                                                                                                                                                                                                                                                                                                                                                                                                                                                                                                                                                                               |
|----|-------------------------------------------------------------------------------------------------------------------------------------------------------------------------------------------------------------------------------------------------------------------------------------------------------------------------------------------------------------------------------------------------------------------------------------------------------------------------------------------------------------------------------------------------------------------------------|
| #1 | <p>[mh "Heart Failure"] OR [mh "Myocardial Infarction"] OR [mh "Arrhythmias, Cardiac"] OR [mh "Heart Diseases"] OR [mh "Cardiovascular Diseases"] OR "coronary artery disease" OR "ischemic heart disease" OR "heart failure" OR "myocardial infarction" OR "ventricular dysfunction" OR "heart attack*" OR "acute coronary syndrome" OR "coronary heart disease" OR "postmyocardial infarction" OR cardiomyopath* OR arrhythmia* OR "heart valve disease" OR "pulmonary heart disease" OR "hypertensive heart disease" OR "cardiovascular disease*" OR "heart disease*")</p> |
| #2 | <p>([mh Caregivers] OR [mh Spouses] OR caregiver* OR "caring intervention" OR "care giver" OR "care givers" OR "care giving" OR spouse* OR "significant other*" OR "family caring" OR "family caregiver*" OR "family partner*" OR "partner support" OR husband* OR wives OR wife OR partner OR "adult children" OR "relatives" OR sibling* OR spouse* OR carers)</p>                                                                                                                                                                                                          |
| #3 | <p>(intervention* OR [mh Counseling] OR [mh "Social Support"] OR [mh Education] OR [mh Mentoring] OR mentor* OR educat* OR counsel* OR coach* OR train* Or teach* Or instruct* OR support* OR "self care" OR "self management" OR psychoeducation OR [mh Telemedicine] OR mHealth OR "mobile health" OR telemedicine OR telemonitoring OR "e health" OR ("text messag*" Or "mobile application*" OR "mobile phone*" OR "cell phone*" or smartphon* Or "smart phone*") AND health))</p>                                                                                        |

|    |                  |
|----|------------------|
| #4 | #1 AND #2 AND #3 |
|----|------------------|

**Table S7. Quality assessment of articles using the NIH quality assessment tool.**

| <b>Author name</b> | <b>Quality Rating</b> |
|--------------------|-----------------------|
| Agren, 2015        | Good                  |
| Agren, 2012        | Fair                  |
| Borji              | Good                  |
| Broadbent          | Good                  |
| Etemadifar         | Good                  |
| Far (Iran)         | Poor                  |
| Fathani (Iran)     | Fair                  |
| Gary               | Good                  |
| Hartford           | Fair                  |
| Hu                 | Good                  |
| Johnston           | Fair                  |
| Kim                | Fair                  |
| Lang               | Good                  |
| Mahler             | Fair                  |
| Molloy             | Good                  |
| Piamjariyakul      | Good                  |
| Sneed              | Good                  |
| Srisuk             | Good                  |
| Wingham            | Good                  |
| Wu                 | Good                  |
